# Supplementary material
Source: PubMed Central journal article supplement (PMC3388112)

**Supplementary Table S1.** The list of primers for constructing Aurora-A wild type and truncated plasmids and mutagenesis.

|    | <b>Primer Name</b>     | <b>Sequences</b>                                |
|----|------------------------|-------------------------------------------------|
| 1  | hAURKA-WT-BglII-For    | 5'-GAAGATCTGATGGACCGATCTAAAGAAAAGTGC-3'         |
| 2  | hAURKA-WT-XbaI-Rev     | 5'-CGTCTAGACTAAGACTGTTTGCTAGCTGATTC-3'          |
| 3  | hAURKA-C1-XbaI-Rev     | 5'-CGTCTAGACTAATTTGCTGTGATCCAGGGGTGT-3'         |
| 4  | hAURKA-C2-XbaI-Rev     | 5'-CGTCTAGACTACAGGGCATTGCGCAATTCTGT-3'          |
| 5  | hAURKA-C3-XbaI-Rev     | 5'-CGTCTAGACTACTCATCAAACCTTTGAAAGTTTCTG-3'      |
| 6  | hAURKA-N1-BglII-For    | 5'-GAAGATCTGGTTCAGAATCAGAAGCAGAAGCAATTGCAGGC-3' |
| 7  | hAURKA-N2-BglII-For    | 5'-GAAGATCTGAGGCCACTGAATAACACCCAAAAGAGC-3'      |
| 8  | hAURKA-N3-BglII-For    | 5'-GAAGATCTGCCCCTGCCATCGGCACCTGAAAATAATCCT-3'   |
| 9  | hAURKA-N4-BglII-For    | 5'-GAAGATCTGGAATTGGTCGCCCTCTGGGTAAAGG-3'        |
| 10 | hAURKA-N5-BglII-For    | 5'-GAAGATCTGGGAGTGGAGCATCAGCTCAGAAGAGAA-3'      |
| 11 | hAURKA-N6-BglII-For    | 5'-GAAGATCTGGATGCTACCAGAGTCTACCTAATTCTGG-3'     |
| 12 | hAURKA-N7-BglII-For    | 5'-GAAGATCTGGATGAGCAGAGAAGTCTACT-3'             |
| 13 | hAURKA-T217A/E221A-For | 5'-GCACCACTTGGAGCAGTTTATAGAGCACTTCAGAAAC-3'     |
| 14 | hAURKA-T217A/E221A-Rev | 5'-GTTTCTGAAGTGCTCTATAAACTGCTCCAAGTGGTGC-3'     |
| 15 | hAURKA-S226A-For       | 5'-GAGAACTTCAGAACTTGCAAAGTTTGATGAGCAG-3'        |
| 16 | hAURKA-S226A-Rev       | 5'-CTGCTCATCAAACCTTTGCAAGTTTCTGAAGTTCTC-3'      |
| 17 | hAURKA-S245A-For       | 5'-GGCAAATGCCCTGGCTTACTGTCATTCGAAG-3'           |
| 18 | hAURKA-S245A-Rev       | 5'-CTTCGAATGACAGTAAGCCAGGGCATTGCC-3'            |
| 19 | hAURKA-S387A-For       | 5'-CCCTGGATCACAGCAAATGCATCAAACCATCAAATTGCC-3'   |
| 20 | hAURKA-S387A-Rev       | 5'-GGCAATTTGATGGTTTTGATGCATTTGCTGTGATCCAGGG-3'  |
| 21 | hAURKA-S245A-For       | 5'-GGCAAATGCCCTGGCTTACTGTCATTCGAAG-3'           |
| 22 | hAURKA-S245A-Rev       | 5'-CTTCGAATGACAGTAAGCCAGGGCATTGCC-3'            |
| 23 | hAURKA-S387A-For       | 5'-CCCTGGATCACAGCAAATGCATCAAACCATCAAATTGCC-3'   |
| 24 | hAURKA-S387A-Rev       | 5'-GGCAATTTGATGGTTTTGATGCATTTGCTGTGATCCAGGG-3'  |
| 25 | hAURKA-E230A-For       | 5'-CAAAGTTTGATGCGCAGAGAAGTGC-3'                 |
| 26 | hAURKA-E230A-Rev       | 5'-GCAGTTCTCTGCGCATCAAACCTTG-3'                 |

**Supplementary Figure S1.** Immunoprecipitation identifies which truncated Aurora-A binds to FBXW7 or GSK3 $\beta$ . HA-tagged FBXW7 and Flag-tagged truncated Aurora-A was expressed in human 293T cells, followed by immunoprecipitation of the proteins with anti-Flag antibodies and immunoblotting with antibodies against HA and GSK3 $\beta$  (upper panel); or immunoprecipitation of the proteins with anti-HA antibodies and immunoblotting with antibodies against Flag (middle panel). Lower panel shows the input levels of GSK3 $\beta$ , FBXW7 and Aurora-A proteins in the lysates. The result indicates only  $\Delta$ N7 is unable to interact with FBXW7 and the  $\Delta$ C2 can't bind to GSK3 $\beta$ .

**Supplementary Figure S2.** Analysis of transcriptional levels of transfected wild type and mutant Aurora-A using semi-quantitative RT-PCR. Total RNA was purified from 293T cells transfected with wild type or mutant Aurora-A using TRIzol (Invitrogen) according to the manufacturer's instructions and then 5  $\mu$ g of each sample was reverse transcribed using the SuperScript II RNaseH first-strand synthesis system (Invitrogen). PCR was performed with 2  $\mu$ l of cDNA from each sample using Extaq DNA polymerase (TAKARA). Primers for Flag-tagged Aurora-A were as follows: sense 5'-GACTACAAAGACCATGACGGT-3' (for Flag) and antisense 5'-TGGTGCATATTCCAGAATTAGG -3' (Aurora-A 621-642).

**Supplementary Figure S3.** Multiple feedback loops among Pi3K-AKT-GSK3 $\beta$ -Aurora-A pathway.

Supplementary Figure S1

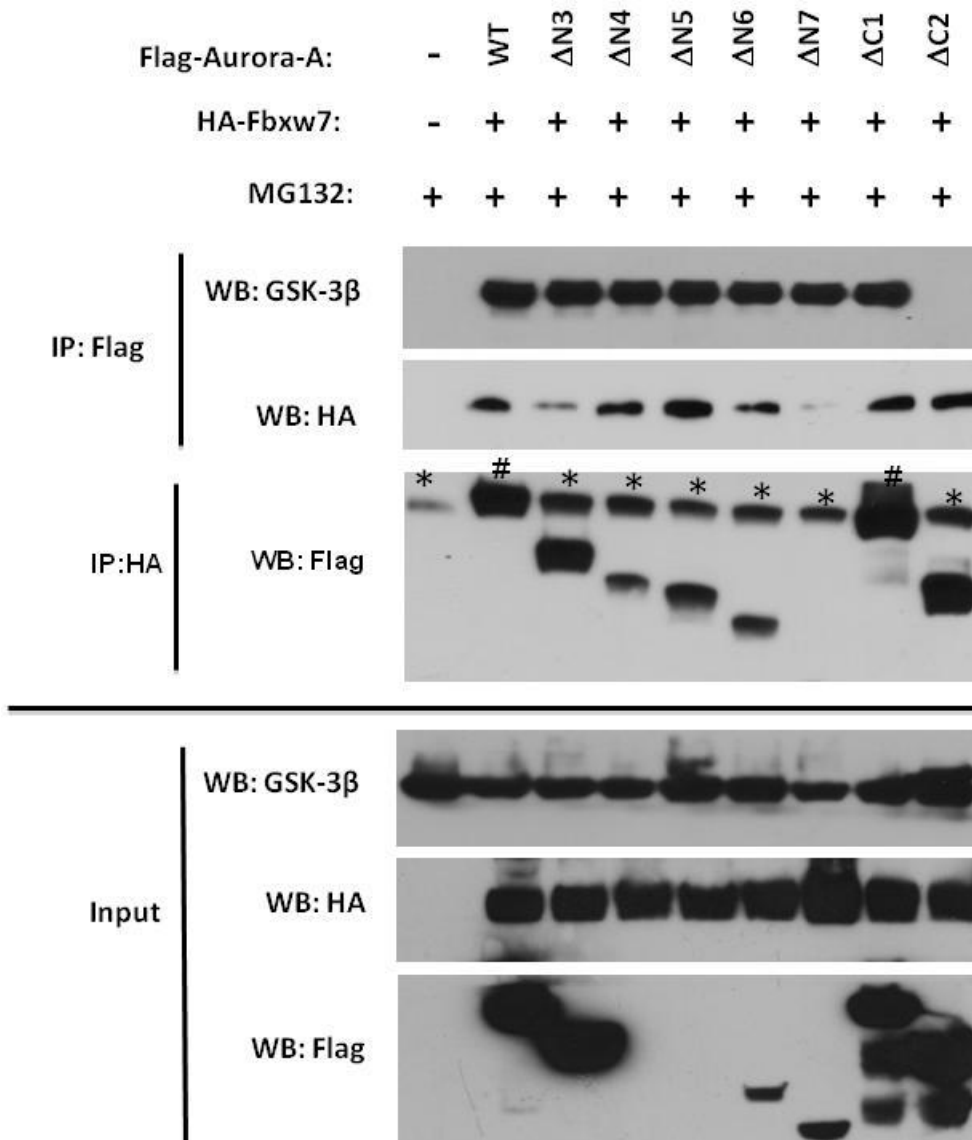

**Note:** #the size of wild type Aurora-A and  $\Delta C1$  is very close to immunoglobulin heavy chain; \* immunoglobulin heavy chain.

Supplementary Figure S2

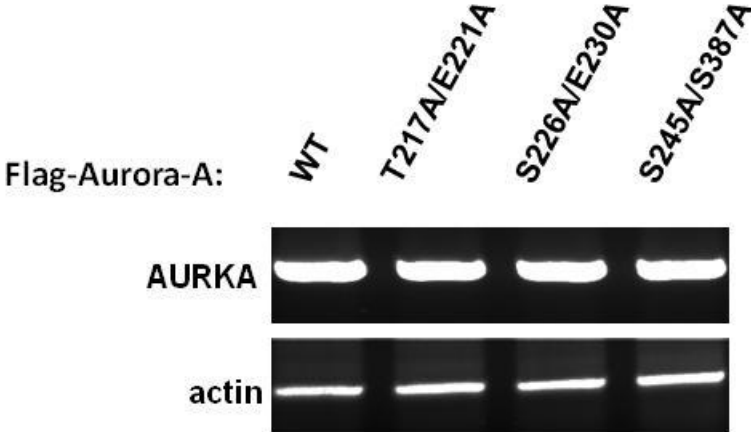

Supplementary Figure S3

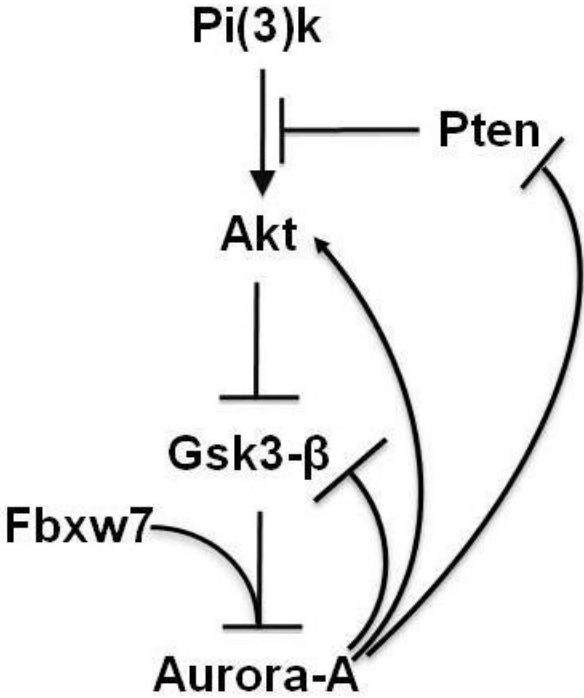

Supplement: NIHMS385863-supplement-Supp.pdf [file NIHMS385863-supplement-Supp.pdf]
